# Supplementary material for: SARS-CoV-2 specific immune-signature in direct contacts of COVID-19 cases protect them from contracting disease: A Retrospective Study
Source: bioRxiv or medRxiv preprint supplement (doi:10.1101/2021.03.11.21253367), 2021-03-12

# Supplementary figure 1

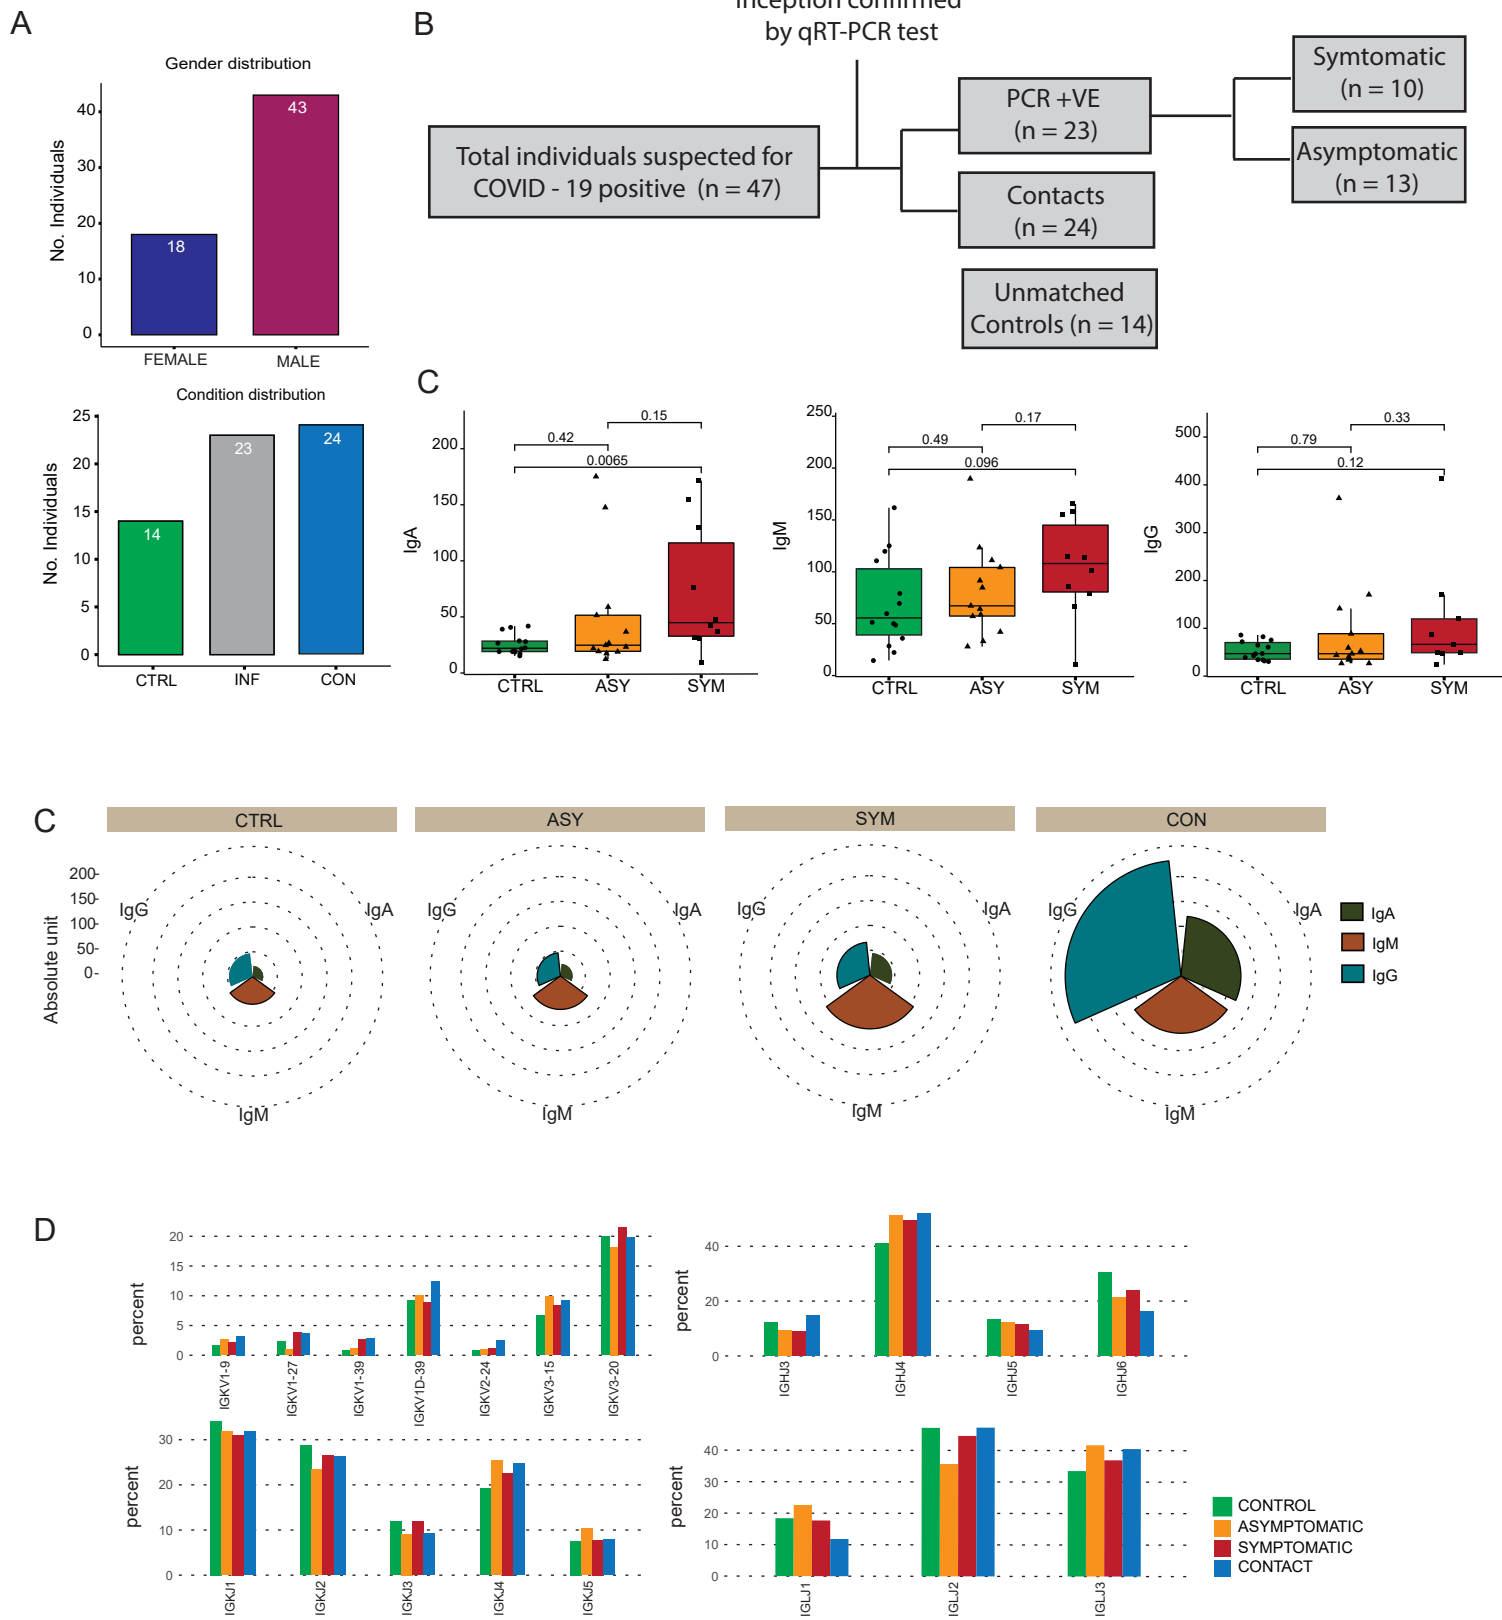

Supplement: Supplementary file [file media-1.pdf]
